# Supplementary material
Source: PubMed Central journal article supplement (PMC8176390)
Supplement: jamaotolaryngolheadnecksurg-e210915-s001.pdf [file jamaotolaryngolheadnecksurg-e210915-s001.pdf]

## Supplementary Online Content

Lee SW, Shim SR, Jeong SY, Kim SJ. Direct comparison of preoperative imaging modalities for localization of primary hyperparathyroidism: a systematic review and network meta-analysis. *JAMA Otolaryngol Head Neck Surg*. Published online June 3, 2021. doi:10.1001/jamaoto.2021.0915

**eFigure 1.** Risk of Bias and Applicability Concerns Graph Based on 15-Item Modified Quality Assessment of Diagnostic Accuracy Studies

**eFigure 2.** Funnel Plots for Eight Representative Categories of Various Imaging Modalities for pHPT Localization in Both Patient- and Lesion-Based Analyses

**eFigure 3.** Evidence Network Plots of Diagnostic Value of Eight Representative Categories of Various Imaging Modalities for pHPT Localization in Both Patient- and Lesion-Based Analyses

**eTable 1.** Search Queries

**eTable 2.** Characteristics of the Enrolled Studies

**eReferences**

This supplementary material has been provided by the authors to give readers additional information about their work.

**eFigure 1.** Risk of Bias and Applicability Concerns Graph Based on 15-Item Modified Quality Assessment of Diagnostic Accuracy Studies. Overall quality of the included studies was deemed satisfactory.

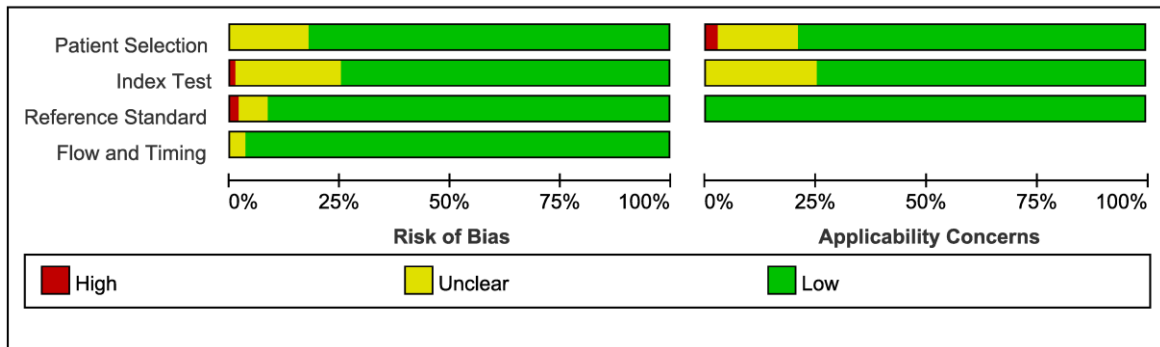

**eFigure 2.** Funnel Plots for Eight Representative Categories of Various Imaging Modalities for pHPT Localization in Both Patient- and Lesion-Based Analyses. (1, Choline PET/CT; 2, MET PET/CT; 3, MIBI SPECT; 4, MIBI planar; 5, Dual tracer; 6, US; 7, CT; 8, MRI)

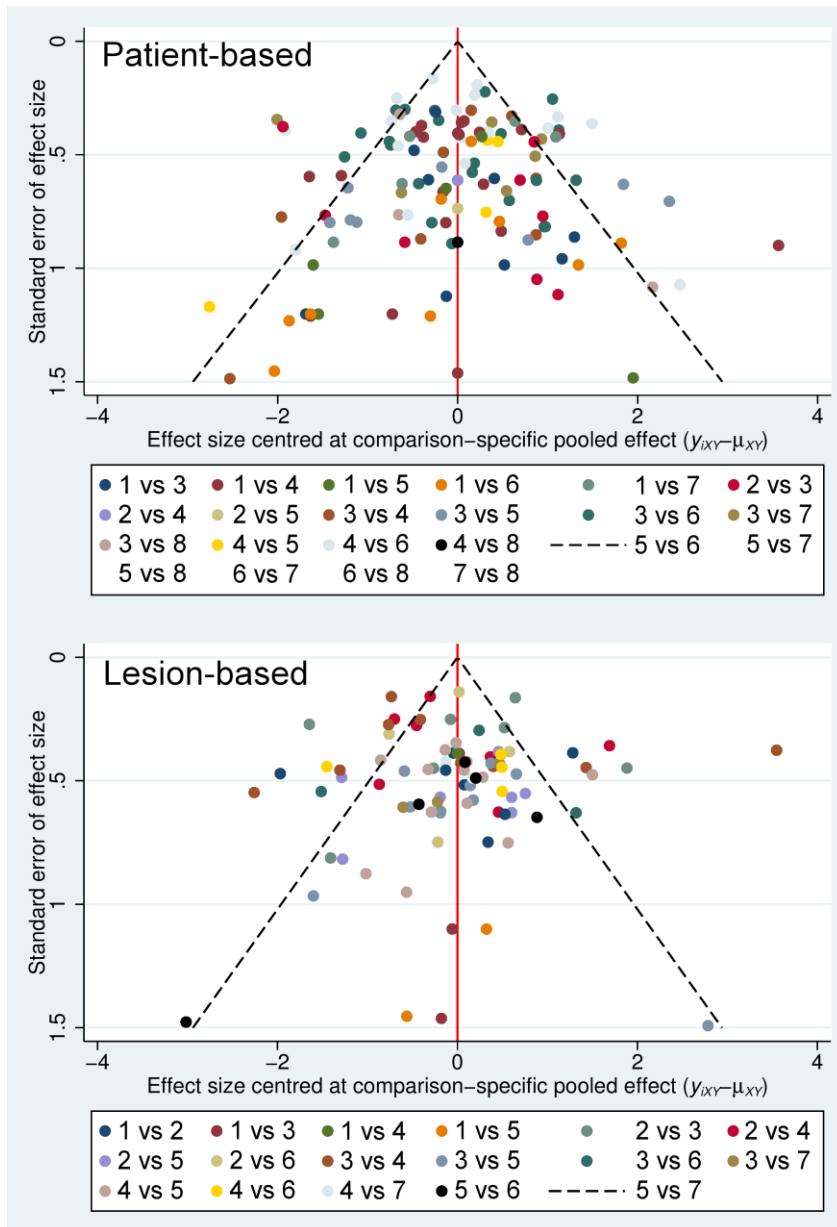

**eFigure 3.** Evidence Network Plots of Diagnostic Value of Eight Representative Categories of Various Imaging Modalities for pHPT Localization in Both Patient- and Lesion-Based Analyses. (1, Choline PET/CT; 2, MET PET/CT; 3, MIBI SPECT; 4, MIBI planar; 5, Dual tracer; 6, US; 7, CT; 8, MRI)

Patient-based

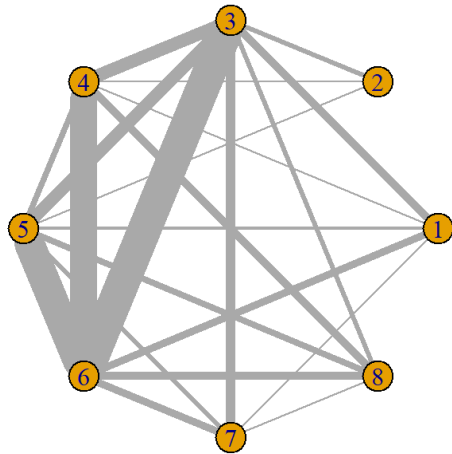

Lesion-based

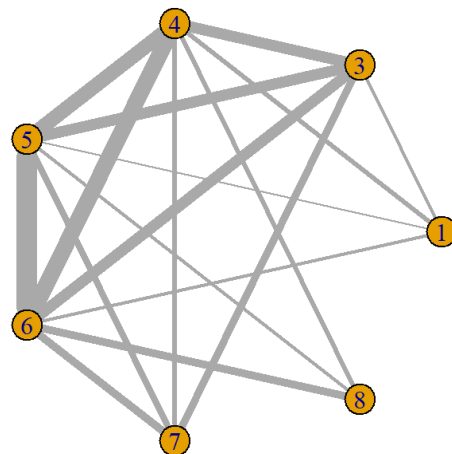

**eTable 1.** Search Queries

|                                                                                                                                                                                                                                                                                                                                                                                                                                                                                                                                                                                                                                                                                        |
|----------------------------------------------------------------------------------------------------------------------------------------------------------------------------------------------------------------------------------------------------------------------------------------------------------------------------------------------------------------------------------------------------------------------------------------------------------------------------------------------------------------------------------------------------------------------------------------------------------------------------------------------------------------------------------------|
| <p><b><u>PubMed and Cochrane library</u></b></p> <ol style="list-style-type: none"><li>1. Disease<br/>("hyperparathyroidism, primary"[MeSH] OR "primary hyperparathyroidism"[tiab] OR "parathyroid adenoma"[tiab])</li><li>2. Intervention<br/>("pet"[tiab] OR "positron emission tomography"[MeSH] OR "spect"[tiab] OR "single photon emission computed tomography"[tiab] OR "scan"[tiab] OR "scintigraphy"[tiab] OR "us"[tiab] OR "ultrasonography"[MeSH] OR "ultrasound"[tiab] OR "ct"[tiab] OR "computed tomography"[tiab] OR "mri"[tiab] OR "magnetic resonance imaging"[MeSH])</li><li>3. Outcome<br/>("detection"[tiab] OR "localization"[tiab] OR "diagnosis"[MeSH])</li></ol> |
| <p><b><u>Embase</u></b></p> <ol style="list-style-type: none"><li>1. Disease<br/>(primary hyperparathyroidism'/exp OR (primary AND hyperparathyroidism) OR 'parathyroid adenoma'/exp OR (parathyroid AND adenoma))</li><li>2. Intervention<br/>(pet:ab,ti OR 'positron emission tomography':ab,ti OR spect:ab,ti OR 'single photon emission computed tomography':ab,ti OR scan:ab,ti OR scintigraphy:ab,ti OR us:ab,ti OR ultrasonography:ab,ti OR ultrasound:ab,ti OR ct:ab,ti OR 'computed tomography':ab,ti OR mri:ab,ti OR 'magnetic resonance imaging':ab,ti)</li><li>3. Outcome<br/>(detection:ab,ti OR localization:ab,ti OR diagnosis:ab,ti)</li></ol>                         |

**eTable 2.** Characteristics of the Enrolled Studies

| Author                      | Year | Patient-based | Lesion-based | Design | Number of patients* | Age (mean)        | Female | Imaging modality <sup>§</sup>                                 | Modality category <sup>  </sup> |
|-----------------------------|------|---------------|--------------|--------|---------------------|-------------------|--------|---------------------------------------------------------------|---------------------------------|
| Cuderman <sup>1</sup>       | 2020 |               | o            | P      | 103                 | 64 <sup>‡</sup>   | 78     | FCH PET/CT vs. MIBI SPECT/CT vs. MIBI planar vs. DT (MIBI-Tc) | 1, 3, 4, 5                      |
| Juweid <sup>2</sup>         | 2020 | o             |              | R      | 34                  | 54.9              | 28     | MIBI pinhole vs. DT (MIBI-Tc)                                 | 4, 5                            |
| Okudan <sup>3</sup>         | 2019 | o             |              | R      | 125                 | 51.3              | 96     | MIBI SPECT/CT vs. US                                          | 3, 6                            |
| Parra Ramírez <sup>4</sup>  | 2019 | o             | o            | P      | 29                  | 58.7              | 22     | MIBI SPECT vs. CE-US                                          | 3, 6                            |
| Vitetta <sup>5</sup>        | 2019 | o             |              | P&R    | 136                 | 59                | 102    | MIBI planar vs. CDHR-US                                       | 4, 6                            |
| Yeh <sup>6</sup>            | 2019 |               | o            | R      | 400                 | 61                | 319    | MIBI SPECT/CT vs. 4D-CT                                       | 3, 7                            |
| Amadou <sup>7</sup>         | 2019 |               | o            | R      | 29                  | 63                | 25     | FCH PET/CT vs. MIBI planar vs. US                             | 1, 4, 6                         |
| Borumandi <sup>8</sup>      | 2019 | o             |              | R      | 117                 | 66 <sup>‡</sup>   | 102    | MIBI SPECT vs. US                                             | 3, 6                            |
| Bossert <sup>9</sup>        | 2019 | o             |              | P      | 17                  | 64.1              | 10     | FCH PET/CT vs. DT (MIBI-Tc) vs. US                            | 1, 5, 6                         |
| Piccardo <sup>10</sup>      | 2019 | o             |              | P      | 44                  | 65.5 <sup>‡</sup> | 35     | FCH PET/CT vs. 4D-CT                                          | 1, 7                            |
| Scattergood <sup>11</sup>   | 2019 | o             |              | P      | 184                 | 66                | 150    | MIBI planar vs. US                                            | 4, 6                            |
| Vu <sup>12</sup>            | 2019 | o             |              | R      | 31                  | 56 <sup>‡</sup>   | 25     | MIBI SPECT vs. 4D-CT                                          | 3, 7                            |
| Khafif <sup>13</sup>        | 2019 | o             |              | P      | 19                  | 60.5              | 15     | FCH PET/MRI vs. MIBI SPECT vs. US                             | 1, 3, 6                         |
| Asseeva <sup>14</sup>       | 2019 | o             |              | R      | 90                  | 64.5 <sup>‡</sup> | 68     | DT (MIBI-I) pinhole & SPECT/CT vs. US                         | 5, 6                            |
| Zajíčková <sup>15</sup>     | 2018 | o             |              | R      | 13                  | 64.3              | 12     | FCH PET/CT vs. MIBI SPECT/CT vs. US                           | 1, 3, 6                         |
| Argirò <sup>16</sup>        | 2018 | o             |              | P      | 57                  | 63.3              | 50     | MIBI SPECT vs. US vs. 3T-MRI                                  | 3, 6, 8                         |
| Beheshti <sup>17</sup>      | 2018 | o             | o            | P      | 82                  | 59.8              | 66     | FCH PET/CT vs. MIBI/TF SPECT/CT                               | 1, 3                            |
| Cunha-Bezerra <sup>18</sup> | 2018 |               | o            | NR     | 18                  | 55.1              | 15     | MIBI planar vs. US vs. 4D-CT                                  | 4, 6, 7                         |

|                          |      |   |   |    |                 |                 |     |                                                         |         |
|--------------------------|------|---|---|----|-----------------|-----------------|-----|---------------------------------------------------------|---------|
| Hiebert <sup>19</sup>    | 2018 | o |   | R  | 97              | 64              | 65  | MIBI SPECT/CT vs. US vs. DE-CT                          | 3, 6, 7 |
| Araz <sup>20</sup>       | 2018 | o |   | R  | 35              | 55.3            | 24  | FCH PET/CT vs. MIBI SPECT/CT                            | 1, 3    |
| Thanseer <sup>21</sup>   | 2017 | o | o | P  | 54              | 47.7            | 38  | FCH PET/CT vs. MIBI planar vs. US                       | 1, 4, 6 |
| Tunca <sup>22</sup>      | 2017 | o |   | R  | 183             | 52.2            | 148 | MIBI SPECT vs. US                                       | 3, 6    |
| Frank <sup>23</sup>      | 2017 | o |   | R  | 52              | 60              | 41  | MIBI SPECT/CT vs. 3D-US                                 | 3, 6    |
| Seyednejad <sup>24</sup> | 2016 | o |   | R  | 24              | 64              | 21  | MIBI SPECT/CT vs. US vs. DE-CT                          | 3, 6, 7 |
| Tan <sup>25</sup>        | 2016 | o |   | R  | 58              | 58              | 35  | MIBI planar vs. US                                      | 4, 6    |
| Krakauer <sup>26</sup>   | 2016 |   | o | P  | 91              | 66 <sup>‡</sup> | 67  | MIBI planar vs. DT (MIBI-I) vs. 4D-CT                   | 4, 5, 7 |
| Galvin <sup>27</sup>     | 2016 | o | o | R  | 40              | 60              | 31  | MIBI SPECT/CT vs. 4D-CT                                 | 3, 7    |
| Heiba <sup>28</sup>      | 2015 |   | o | R  | 155             | 58              | 108 | MIBI SPECT/CT vs. MIBI pinhole vs. DT (MIBI-I) SPECT/CT | 3, 4, 5 |
| Brown <sup>29</sup>      | 2015 | o |   | R  | 100             | 62.1            | 78  | MIBI SPECT/CT vs. US vs. 4D-CT                          | 3, 6, 7 |
| Suh <sup>30</sup>        | 2015 |   | o | R  | 38              | 55.8            | 27  | MIBI SPECT/CT vs. US vs. 4D-CT                          | 3, 6, 7 |
| Hayakawa <sup>31</sup>   | 2015 | o |   | NR | 23              | 60.9            | 19  | MET PET/CT vs. MIBI SPECT/CT vs. MIBI planar            | 2, 3, 4 |
| Michaud <sup>32</sup>    | 2015 | o |   | P  | 11              |                 |     | FCH PET/CT vs. DT (MIBI-I) vs. US                       | 1, 5, 6 |
| Berner <sup>33</sup>     | 2015 |   | o | R  | 64 <sup>†</sup> | 55              | 48  | DT (MIBI-Tc) SPECT/CT vs. US                            | 5, 6    |
| Guerin <sup>34</sup>     | 2015 | o |   | NR | 199             | 64              | 163 | DT (MIBI-I) pinhole & SPECT vs. US                      | 5, 6    |
| Ozkaya <sup>35</sup>     | 2015 |   | o | R  | 39              | 41              | 27  | MIBI SPECT vs. US                                       | 3, 6    |
| Noda <sup>36</sup>       | 2014 | o |   | R  | 61              | 63.5            | 52  | MIBI planar vs. US                                      | 4, 6    |
| Orevi <sup>37</sup>      | 2014 | o |   | P  | 26              |                 |     | CCH PET/CT vs. MIBI SPECT/CT                            | 1, 3    |
| Ersoy <sup>38</sup>      | 2014 | o |   | P  | 47              | 51.5            | 39  | MIBI planar vs. E-US                                    | 4, 6    |
| D'Agostino <sup>39</sup> | 2013 |   | o | P  | 27              | 56.9            | 21  | DT (MIBI-I) SPECT/CT vs. CT                             | 5, 7    |

|                               |      |   |    |     |                 |     |                                                     |            |
|-------------------------------|------|---|----|-----|-----------------|-----|-----------------------------------------------------|------------|
| Schalin-Jäntti <sup>40</sup>  | 2013 | o | P  | 19  | 58.4            | 15  | MET PET/CT vs. MIBI SPECT/CT vs. DT (MIBI-I)        | 2, 3, 5    |
| Kwon <sup>41</sup>            | 2013 | o | R  | 105 | 53.8            | 77  | MIBI planar vs. US                                  | 4, 6       |
| Kim <sup>42</sup>             | 2012 | o | NR | 24  |                 |     | MIBI SPECT/CT vs. MIBI planar                       | 3, 4       |
| Aschenbach <sup>43</sup>      | 2012 | o | R  | 30  | 45 <sup>‡</sup> | 24  | MIBI planar vs. dMRA                                | 4, 8       |
| Shafiei <sup>44</sup>         | 2012 | o | P  | 48  | 59.4            | 33  | MIBI SPECT/CT vs. MIBI planar                       | 3, 4       |
| Akbaba <sup>45</sup>          | 2012 | o | NR | 98  | 53.8            | 74  | MIBI SPECT vs. MIBI planar vs. US vs. MRI           | 3, 4, 6, 8 |
| Agha <sup>46</sup>            | 2012 | o | NR | 30  | 58              | 25  | MIBI planar vs. CE-US vs. MRI                       | 4, 6, 8    |
| Grayev <sup>47</sup>          | 2012 | o | P  | 25  | 59.7            | 22  | MIBI planar vs. 3T-MRI                              | 4, 8       |
| Adler <sup>48</sup>           | 2011 | o | P  | 310 | 60              | 226 | MIBI planar vs. US                                  | 4, 6       |
| Eichhorn-Wharry <sup>49</sup> | 2011 | o | R  | 135 | 59.2            | 109 | MIBI SPECT vs. 4D-CT                                | 3, 7       |
| Patel <sup>50</sup>           | 2010 | o | R  | 63  | 59 <sup>‡</sup> | 42  | MIBI SPECT/CT vs. US                                | 3, 6       |
| Prommegger <sup>51</sup>      | 2009 | o | P  | 116 | 59              | 80  | MIBI SPECT/CT vs CT                                 | 3, 7       |
| Thomas <sup>52</sup>          | 2009 | o | P  | 36  |                 | 25  | MIBI SPECT vs. MIBI planar                          | 3, 4       |
| Tresoldi <sup>53</sup>        | 2009 | o | R  | 65  |                 |     | DT (MIBI-Tc) vs. US                                 | 5, 6       |
| Tublin <sup>54</sup>          | 2009 | o | P  | 144 | 63.2            | 117 | MIBI SPECT vs. US                                   | 3, 6       |
| Tang <sup>55</sup>            | 2008 | o | P  | 22  |                 |     | MET PET/CT vs. MIBI SPECT                           | 2, 3       |
| Ho Shon <sup>56</sup>         | 2008 | o | R  | 62  | 59              | 47  | MIBI SPECT vs. MIBI pinhole vs DT (MIBI-Tc) SPECT   | 3, 4, 5    |
| Ansquer <sup>57</sup>         | 2008 | o | R  | 49  | 69 <sup>‡</sup> | 38  | MIBI SPECT vs. DT (MIBI-Tc) vs. US                  | 3, 5, 6    |
| Nichols <sup>58</sup>         | 2008 | o | R  | 462 | 58.5            | 336 | MIBI SPECT vs. MIBI planar vs. DT (MIBI-Tc) pinhole | 3, 4, 5    |
| Carrier <sup>59</sup>         | 2008 | o | P  | 51  | 56              | 38  | MIBI pinhole SPECT vs. DT (MIBI-Tc) vs. US          | 3, 5, 6    |



|                          |      |   |     |     |                   |     |                                             |            |
|--------------------------|------|---|-----|-----|-------------------|-----|---------------------------------------------|------------|
| Boudreaux <sup>60</sup>  | 2007 | o | R   | 249 |                   |     | MIBI planar vs. US                          | 4, 6       |
| Taïeb <sup>61</sup>      | 2007 |   | P   | 35  | 61                | 30  | MIBI SPECT vs. DT (MIBI-I) pinhole vs. US   | 3, 5, 6    |
| Prasannan <sup>62</sup>  | 2007 | o | P   | 130 | 59.1              | 97  | MIBI planar vs. S-US                        | 4, 6       |
| Lavelly <sup>63</sup>    | 2007 | o | R   | 98  | 59.9              | 68  | MIBI SPECT/CT vs. MIBI planar               | 3, 4       |
| Ruf <sup>64</sup>        | 2007 | o | R   | 26  | 51.6              | 14  | MIBI SPECT/CT vs. MIBI planar               | 3, 4       |
| Lo <sup>65</sup>         | 2007 | o | P   | 100 | 55.5 <sup>‡</sup> | 70  | MIBI planar vs. US                          | 4, 6       |
| Rodgers <sup>66</sup>    | 2006 |   | P&R | 75  | 60                | 63  | MIBI SPECT/CT vs. US vs. 4D-CT              | 3, 6, 7    |
| Steward <sup>67</sup>    | 2006 | o | R   | 103 |                   |     | MIBI planar vs. S-US                        | 4, 6       |
| Barczynski <sup>68</sup> | 2006 | o | P   | 121 | 56.1              | 106 | DT (MIBI-Tc) vs. US                         | 5, 6       |
| Saeed <sup>69</sup>      | 2006 | o | R   | 29  | 46                | 18  | MIBI planar vs. MRI                         | 4, 8       |
| Krausz <sup>70</sup>     | 2006 | o | R   | 36  | 53                | 25  | MIBI SPECT/CT vs. MIBI planar               | 3, 4       |
| Solorzano <sup>71</sup>  | 2006 | o | R   | 226 | 58                | 178 | MIBI SPECT vs. S-US                         | 3, 6       |
| Lorberboym <sup>72</sup> | 2005 | o | P   | 41  | 63.5              | 30  | MIBI SPECT vs. DT (MIBI-Tc)                 | 3, 5       |
| Masatsugu <sup>73</sup>  | 2005 | o | NR  | 110 | 59.1              | 97  | MIBI planar vs. US                          | 4, 6       |
| Ruf <sup>74</sup>        | 2004 | o | NR  | 17  | 51.2              | 9   | MIBI SPECT vs. MRI                          | 3, 8       |
| Schachter <sup>75</sup>  | 2004 | o | NR  | 82  | 63.5              | 54  | MIBI SPECT vs. DT (MIBI-Tc)                 | 3, 5       |
| Saint Marc <sup>76</sup> | 2004 | o | P   | 149 | 65.3              | 112 | MIBI planar vs. US                          | 4, 6       |
| Lumachi <sup>77</sup>    | 2004 | o | P   | 44  | 59                | 31  | DT (MIBI-Tc) vs. CT                         | 5, 7       |
| Kebapci <sup>78</sup>    | 2004 |   | NR  | 52  | 53                | 43  | MIBI planar vs. US                          | 4, 6       |
| Lumachi <sup>79</sup>    | 2003 | o | R   | 112 | 56.2              | 83  | DT (MIBI-Tc) vs. US                         | 5, 6       |
| Wakamatsu <sup>80</sup>  | 2003 |   | NR  | 35  | 57.6              | 33  | MIBI planar vs. DT (MIBI-I) vs. US vs. MRI  | 4, 5, 6, 8 |
| Lorberboym <sup>81</sup> | 2003 | o | P   | 52  | 63.5              | 38  | MIBI SPECT vs. MIBI planar vs. DT (MIBI-Tc) | 3, 4, 5    |

|                            |      |   |    |                 |      |     |                                             |            |
|----------------------------|------|---|----|-----------------|------|-----|---------------------------------------------|------------|
| Prager <sup>82</sup>       | 2003 | o | P  | 150             | 59.6 | 113 | MIBI SPECT vs. US                           | 3, 6       |
| Leslie <sup>83</sup>       | 2002 | o | NR | 68              | 57   | 46  | MIBI planar vs. DT (MIBI-Tc)                | 4, 5       |
| Haber <sup>84</sup>        | 2002 | o | NR | 74              |      |     | DT (MIBI-I) vs. US                          | 5, 6       |
| Berczi <sup>85</sup>       | 2002 | o | P  | 63              | 54   | 50  | DT (MIBI-Tc) vs. US                         | 5, 6       |
| Wakamatsu <sup>86</sup>    | 2001 | o | R  | 25              | 60   | 20  | DT (TF-Tc, MIBI-Tc, Tl-Tc) vs. US vs. MRI   | 5, 6, 8    |
| Ho Shon <sup>87</sup>      | 2001 | o | R  | 85              | 62   | 77  | MIBI planar vs. DT (MIBI-Tc)                | 4, 5       |
| Scheiner <sup>88</sup>     | 2001 | o | NR | 31              | 61   | 22  | MIBI SPECT vs. US                           | 3, 6       |
| Casara <sup>89</sup>       | 2001 | o | NR | 143             | 47.3 | 84  | DT (MIBI-Tc) vs. US                         | 5, 6       |
| Prager <sup>90</sup>       | 2001 | o | P  | 100             | 63   | 79  | MIBI SPECT vs. US                           | 3, 6       |
| Feingold <sup>91</sup>     | 2000 | o | R  | 62              | 55   | 41  | MIBI SPECT vs. US                           | 3, 6       |
| Krausz <sup>92</sup>       | 2000 | o | P  | 77              | 58   | 58  | DT (MIBI-Tc) vs. US                         | 5, 6       |
| Lumachi <sup>93</sup>      | 2000 | o | NR | 91              | 59   | 65  | DT (MIBI-Tc) vs. US                         | 5, 6       |
| Gallowitsch <sup>94</sup>  | 2000 | o | NR | 23              | 62.7 | 18  | TF SPECT vs. DT (TF-Tc) vs. US              | 3, 5, 6    |
| Moka <sup>95</sup>         | 2000 | o | NR | 92              | 60   | 58  | MIBI SPECT vs. DT (MIBI-Tc)                 | 3, 5       |
| Moka <sup>96</sup>         | 2000 | o | NR | 72              | 58   | 46  | MIBI SPECT vs. DT (MIBI-Tc)                 | 3, 5       |
| Hiromatsu <sup>97</sup>    | 2000 | o | NR | 20              | 51   | 20  | DT (TF-Tc) vs. US vs. CT vs. MRI            | 5, 6, 7, 8 |
| De Feo <sup>98</sup>       | 2000 | o | P  | 16              | 61   | 16  | MIBI planar vs. US vs. CT vs. MRI           | 4, 6, 7, 8 |
| Catargi <sup>99</sup>      | 1999 | o | P  | 14              | 49.3 | 12  | DT (MIBI-Tc) vs. E-US                       | 5, 6       |
| Takami <sup>100</sup>      | 1999 | o | NR | 52              |      |     | MIBI planar vs. DT (Tl-Tc) vs. US vs. CT    | 4, 5, 6, 7 |
| Gallowitsch <sup>101</sup> | 1997 | o | NR | 35              | 62.8 | 29  | TF SPECT vs. TF planar vs. US               | 3, 4, 6    |
| Hewin <sup>102</sup>       | 1997 | o | P  | 49              | 57   | 38  | DT (Tl-Tc) vs. US vs. MRI                   | 5, 6, 8    |
| Chen <sup>103</sup>        | 1997 | o | NR | 49 <sup>†</sup> |      |     | MIBI SPECT vs. MIBI planar vs. DT (MIBI-Tc) | 3, 4, 5    |

|                           |      |   |    |                 |                 |    |                            |         |
|---------------------------|------|---|----|-----------------|-----------------|----|----------------------------|---------|
| Fayet <sup>104</sup>      | 1997 | o | P  | 18              | 59              | 15 | MIBI planar vs. MRI        | 4, 8    |
| Bonjer <sup>105</sup>     | 1997 | o | R  | 21              |                 |    | MIBI planar vs. US         | 4, 6    |
| Arkles <sup>106</sup>     | 1996 | o | R  | 105             |                 |    | DT (Tl-Tc) vs. US          | 5, 6    |
| Rauth <sup>107</sup>      | 1996 | o | R  | 14              |                 | 10 | MIBI planar vs. DT (Tl-Tc) | 4, 5    |
| Light <sup>108</sup>      | 1996 | o | P  | 21 <sup>†</sup> |                 | 17 | MIBI planar vs. US         | 4, 6    |
| Liou <sup>109</sup>       | 1996 | o | R  | 16              | 56.3            | 9  | DT (Tl-Tc) vs. US          | 5, 6    |
| Billy <sup>110</sup>      | 1995 | o | P  | 17              | 48              | 12 | MIBI planar vs. US         | 4, 6    |
| Gallacher <sup>111</sup>  | 1993 | o | P  | 30              | 62.5            | 23 | DT (Tl-Tc) vs. US          | 5, 6    |
| Uden <sup>112</sup>       | 1990 | o | NR | 50              | 70 <sup>‡</sup> | 46 | DT (Tl-Tc) vs. US vs. CT   | 5, 6, 7 |
| Whelan <sup>113</sup>     | 1989 | o | P  | 16              |                 |    | US vs. MRI                 | 6, 8    |
| Summers <sup>114</sup>    | 1989 | o | NR | 30              |                 |    | DT (Tl-Tc) vs. US          | 5, 6    |
| Roses <sup>115</sup>      | 1989 | o | P  | 36              | 55              | 20 | DT (Tl-Tc) vs. US vs. CT   | 5, 6, 7 |
| Auffermann <sup>116</sup> | 1988 | o | P  | 20              |                 |    | DT (Tl-Tc) vs. US vs. MRI  | 5, 6, 8 |
| Peck <sup>117</sup>       | 1987 | o | P  | 18              |                 |    | DT (Tl-Tc) vs. MRI         | 5, 8    |
| Gooding <sup>118</sup>    | 1986 | o | P  | 34              |                 |    | DT (Tl-Tc) vs. US          | 5, 6    |
| Winzelberg <sup>119</sup> | 1985 | o | P  | 24              |                 |    | DT (Tl-Tc) vs. US          | 5, 6    |

R, retrospective; P, prospective; NR, not reported; MIBI, <sup>99m</sup>Tc-sestamibi; DT, dual tracer; Tc, <sup>99m</sup>Tc-pertechnetate; SPECT, single photon emission computed tomography; CT, computed tomography; US, ultrasonography; CE-US, contrast enhanced US; FCH, <sup>18</sup>F-fluorocholine; PET, positron emission tomography; CDHR-US, high resolution US with color-Doppler; 4D-CT, 4 dimensional CT; MRI, magnetic resonance imaging; I, <sup>123</sup>I; TF, <sup>99m</sup>Tc-tetrofosmin; DE-CT, dual energy CT; 3D-US, 3 dimensional US; MET, <sup>11</sup>C-methionine; CCH, <sup>11</sup>C-choline; E-US, endoscopic US; dMRA, dynamic magnetic resonance angiography; S-US, surgeon performed US; Tl, <sup>201</sup>Tl

\*The number of patients with primary hyperparathyroidism with direct comparison data for each imaging test was indicated.

†The total number of patients with hyperparathyroidism was indicated because there were no separate data only for patients with primary hyperparathyroidism.

‡Median value was indicated due to no available mean value.

§Imaging modalities without available direct comparison data were excluded.

||Imaging categories are as follows; 1. Choline PET/CT including FCH PET/CT, FCH PET/MRI, and CCH PET/CT; 2. MET PET/CT; 3. MIBI SPECT including MIBI SPECT/CT, MIBI pinhole SPECT, MIBI SPECT/contrast enhanced CT, TF SPECT, and TF SPECT/CT; 4. MIBI planar including MIBI pinhole and TF planar; 5. Dual tracer including MIBI-Tc subtraction, MIBI-I subtraction, TF-Tc subtraction, and TI-Tc subtraction with planar, pinhole, SPECT, or SPECT/CT; 6. US including CE-US, CDHR-US, 3D-US, E-US, and S-US; 7. CT including 4D-CT and DE-CT; 8. MRI including 3T-MRI and dMRA

## References

1. Cuderman A, Senica K, Rep S, et al. (18)F-Fluorocholine PET/CT in Primary Hyperparathyroidism: Superior Diagnostic Performance to Conventional Scintigraphic Imaging for Localization of Hyperfunctioning Parathyroid Glands. *J Nucl Med*. 2020;61(4):577-583.
2. Juweid ME, Omari Y, Khawaja N, et al. Use of pinhole dual-phase Tc-99m sestamibi vs combined Tc-99m sestamibi and Tc-99m pertechnetate scintigraphy in patients with hyperparathyroidism where single-photon emission computed tomography/computed tomography is unavailable. *Nucl Med Commun*. 2020;41(2):87-95.
3. Okudan B, Seven B, Coskun N, Albayrak A. Comparison between single-photon emission computed tomography/computed tomography and ultrasound in preoperative detection of parathyroid adenoma: retrospective review of an institutional experience. *Nucl Med Commun*. 2019;40(12):1211-1215.
4. Parra Ramirez P, Santiago Hernando A, Barquiel Alcala B, Martin Rojas-Marcos P, Lisbona Catalan A, Alvarez Escola C. Potential Utility of Contrast-Enhanced Ultrasound in the Preoperative Evaluation of Primary Hyperparathyroidism. *J Ultrasound Med*. 2019;38(10):2565-2571.
5. Vitetta GM, Ravera A, Mensa G, et al. Actual role of color-doppler high-resolution neck ultrasonography in primary hyperparathyroidism: a clinical review and an observational study with a comparison of (99m)Tc-sestamibi parathyroid scintigraphy. *J Ultrasound*. 2019;22(3):291-308.
6. Yeh R, Tay YD, Tabacco G, et al. Diagnostic Performance of 4D CT and Sestamibi SPECT/CT in Localizing Parathyroid Adenomas in Primary Hyperparathyroidism. *Radiology*. 2019;291(2):469-476.
7. Amadou C, Bera G, Ezziane M, et al. 18F-Fluorocholine PET/CT and Parathyroid 4D Computed Tomography for Primary Hyperparathyroidism: The Challenge of Reoperative Patients. *World J Surg*. 2019;43(5):1232-1242.
8. Borumandi F, Daultrey H, Laji K, Bosman D, Ashford N, Alam P. Detectability and surgical outcomes in parathyroid surgery - a single-centre experience. *Br J Oral Maxillofac Surg*. 2019;57(4):330-335.
9. Bossert I, Chytiris S, Hodolic M, et al. PET/CT with (18)F-Choline localizes hyperfunctioning parathyroid adenomas equally well in normocalcemic hyperparathyroidism as in overt hyperparathyroidism. *J Endocrinol Invest*. 2019;42(4):419-426.
10. Piccardo A, Trimboli P, Rutigliani M, et al. Additional value of integrated (18)F-choline PET/4D contrast-enhanced CT in the localization of hyperfunctioning parathyroid glands and correlation with molecular profile. *Eur J Nucl Med Mol Imaging*. 2019;46(3):766-775.

11. Scattergood S, Marsden M, Kyrimi E, Ishii H, Doddi S, Sinha P. Combined ultrasound and Sestamibi scintigraphy provides accurate preoperative localisation for patients with primary hyperparathyroidism. *Ann R Coll Surg Engl.* 2019;101(2):97-102.
12. Vu TH, Schellingerhout D, Guha-Thakurta N, et al. Solitary Parathyroid Adenoma Localization in Technetium Tc99m Sestamibi SPECT and Multiphase Multidetector 4D CT. *AJNR Am J Neuroradiol.* 2019;40(1):142-149.
13. Khafif A, Masalha M, Landsberg R, et al. The role of F18-fluorocholine positron emission tomography/magnetic resonance imaging in localizing parathyroid adenomas. *Eur Arch Otorhinolaryngol.* 2019;276(5):1509-1516.
14. Asseeva P, Paladino NC, Guerin C, et al. Value of (123)I/(99m)Tc-sestamibi parathyroid scintigraphy with subtraction SPECT/CT in primary hyperparathyroidism for directing minimally invasive parathyroidectomy. *Am J Surg.* 2019;217(1):108-113.
15. Zajickova K, Zogala D, Kubinyi J. Parathyroid imaging by (18)F-fluorocholine PET/CT in patients with primary hyperparathyroidism and inconclusive conventional methods: clinico-pathological correlations. *Physiol Res.* 2018;67(Suppl 3):S551-S557.
16. Argiro R, Diacinti D, Sacconi B, et al. Diagnostic accuracy of 3T magnetic resonance imaging in the preoperative localisation of parathyroid adenomas: comparison with ultrasound and 99mTc-sestamibi scans. *Eur Radiol.* 2018;28(11):4900-4908.
17. Beheshti M, Hehenwarter L, Paymani Z, et al. (18)F-Fluorocholine PET/CT in the assessment of primary hyperparathyroidism compared with (99m)Tc-MIBI or (99m)Tc-tetrofosmin SPECT/CT: a prospective dual-centre study in 100 patients. *Eur J Nucl Med Mol Imaging.* 2018;45(10):1762-1771.
18. Cunha-Bezerra P, Vieira R, Amaral F, et al. Better performance of four-dimension computed tomography as a localization procedure in normocalcemic primary hyperparathyroidism. *J Med Imaging Radiat Oncol.* 2018.
19. Hiebert J, Hague C, Hou S, Wiseman SM. Dual energy computed tomography should be a first line preoperative localization imaging test for primary hyperparathyroidism patients. *Am J Surg.* 2018;215(5):788-792.
20. Araz M, Soydal C, Ozkan E, et al. The efficacy of fluorine-18-choline PET/CT in comparison with 99mTc-MIBI SPECT/CT in the localization of a hyperfunctioning parathyroid gland in primary hyperparathyroidism. *Nucl Med Commun.* 2018;39(11):989-994.
21. Thanseer N, Bhadada SK, Sood A, et al. Comparative Effectiveness of Ultrasonography, 99mTc-Sestamibi, and 18F-Fluorocholine PET/CT in Detecting Parathyroid Adenomas in Patients With Primary Hyperparathyroidism. *Clin Nucl Med.* 2017;42(12):e491-e497.
22. Tunca F, Akici M, Iscan Y, Cem Sormaz I, Giles Senyurek Y, Terzioglu T. The impact of combined interpretation of localization studies on image-guided surgical approaches for primary hyperparathyroidism. *Minerva Endocrinol.* 2017;42(3):213-222.
23. Frank SJ, Goldman-Yassen AE, Koenigsberg T, Libutti SK, Koenigsberg M. Sensitivity of 3-

- Dimensional Sonography in Preoperative Evaluation of Parathyroid Glands in Patients With Primary Hyperparathyroidism. *J Ultrasound Med.* 2017;36(9):1897-1904.
24. Seyednejad N, Healy C, Tiwari P, et al. Dual-energy computed tomography: a promising novel preoperative localization study for treatment of primary hyperparathyroidism. *Am J Surg.* 2016;211(5):839-845.
  25. Tan MZ, Ng JC, Eisman JA, Ng DC, Hansen L, Chandran M. A Retrospective Review of Imaging and Operative Modalities Performed in Patients with Primary Hyperparathyroidism at a Mid-Volume Surgical Centre in Southeast Asia. *Ann Acad Med Singap.* 2016;45(5):191-197.
  26. Krakauer M, Wieslander B, Myschetzky PS, et al. A Prospective Comparative Study of Parathyroid Dual-Phase Scintigraphy, Dual-Isotope Subtraction Scintigraphy, 4D-CT, and Ultrasonography in Primary Hyperparathyroidism. *Clin Nucl Med.* 2016;41(2):93-100.
  27. Galvin L, Oldan JD, Bahl M, Eastwood JD, Sosa JA, Hoang JK. Parathyroid 4D CT and Scintigraphy: What Factors Contribute to Missed Parathyroid Lesions? *Otolaryngol Head Neck Surg.* 2016;154(5):847-853.
  28. Heiba SI, Jiang M, Rivera J, et al. Direct comparison of neck pinhole dual-tracer and dual-phase MIBI accuracies with and without SPECT/CT for parathyroid adenoma detection and localization. *Clin Nucl Med.* 2015;40(6):476-482.
  29. Brown SJ, Lee JC, Christie J, et al. Four-dimensional computed tomography for parathyroid localization: a new imaging modality. *ANZ J Surg.* 2015;85(6):483-487.
  30. Suh YJ, Choi JY, Kim SJ, et al. Comparison of 4D CT, ultrasonography, and 99mTc sestamibi SPECT/CT in localizing single-gland primary hyperparathyroidism. *Otolaryngol Head Neck Surg.* 2015;152(3):438-443.
  31. Hayakawa N, Nakamoto Y, Kurihara K, et al. A comparison between 11C-methionine PET/CT and MIBI SPECT/CT for localization of parathyroid adenomas/hyperplasia. *Nucl Med Commun.* 2015;36(1):53-59.
  32. Michaud L, Balogova S, Burgess A, et al. A Pilot Comparison of 18F-fluorocholine PET/CT, Ultrasonography and 123I/99mTc-sestaMIBI Dual-Phase Dual-Isotope Scintigraphy in the Preoperative Localization of Hyperfunctioning Parathyroid Glands in Primary or Secondary Hyperparathyroidism: Influence of Thyroid Anomalies. *Medicine (Baltimore).* 2015;94(41):e1701.
  33. Berner AM, Haroon A, Nowosinska E, et al. Localization of parathyroid disease with 'sequential multiphase and dual-tracer' technique and comparison with neck ultrasound. *Nucl Med Commun.* 2015;36(1):45-52.
  34. Guerin C, Lowery A, Gabriel S, et al. Preoperative imaging for focused parathyroidectomy: making a good strategy even better. *Eur J Endocrinol.* 2015;172(5):519-526.
  35. Ozkaya M, Elboga U, Sahin E, et al. Evaluation of conventional imaging techniques on preoperative localization in primary hyperparathyroidism. *Bosn J Basic Med Sci.*

- 2015;15(1):61-66.
36. Noda S, Onoda N, Kashiwagi S, et al. Strategy of operative treatment of hyperparathyroidism using US scan and (99m)Tc-MIBI SPECT/CT. *Endocr J*. 2014;61(3):225-230.
  37. Orevi M, Freedman N, Mishani E, Bocher M, Jacobson O, Krausz Y. Localization of parathyroid adenoma by (1)(1)C-choline PET/CT: preliminary results. *Clin Nucl Med*. 2014;39(12):1033-1038.
  38. Ersoy R, Ersoy O, Evranos Ogmen B, et al. Diagnostic value of endoscopic ultrasonography for preoperative localization of parathyroid adenomas. *Endocrine*. 2014;47(1):221-226.
  39. D'Agostino J, Diana M, Vix M, et al. Three-dimensional metabolic and radiologic gathered evaluation using VR-RENDER fusion: a novel tool to enhance accuracy in the localization of parathyroid adenomas. *World J Surg*. 2013;37(7):1618-1625.
  40. Schalin-Jantti C, Ryhanen E, Heiskanen I, et al. Planar scintigraphy with 123I/99mTc-sestamibi, 99mTc-sestamibi SPECT/CT, 11C-methionine PET/CT, or selective venous sampling before reoperation of primary hyperparathyroidism? *J Nucl Med*. 2013;54(5):739-747.
  41. Kwon JH, Kim EK, Lee HS, Moon HJ, Kwak JY. Neck ultrasonography as preoperative localization of primary hyperparathyroidism with an additional role of detecting thyroid malignancy. *Eur J Radiol*. 2013;82(1):e17-21.
  42. Kim YI, Jung YH, Hwang KT, Lee HY. Efficacy of (9)(9)mTc-sestamibi SPECT/CT for minimally invasive parathyroidectomy: comparative study with (9)(9)mTc-sestamibi scintigraphy, SPECT, US and CT. *Ann Nucl Med*. 2012;26(10):804-810.
  43. Aschenbach R, Tuda S, Lamster E, et al. Dynamic magnetic resonance angiography for localization of hyperfunctioning parathyroid glands in the reoperative neck. *Eur J Radiol*. 2012;81(11):3371-3377.
  44. Shafiei B, Hoseinzadeh S, Fotouhi F, et al. Preoperative (9)(9)mTc-sestamibi scintigraphy in patients with primary hyperparathyroidism and concomitant nodular goiter: comparison of SPECT-CT, SPECT, and planar imaging. *Nucl Med Commun*. 2012;33(10):1070-1076.
  45. Akbaba G, Berker D, Isik S, et al. A comparative study of pre-operative imaging methods in patients with primary hyperparathyroidism: ultrasonography, 99mTc sestamibi, single photon emission computed tomography, and magnetic resonance imaging. *J Endocrinol Invest*. 2012;35(4):359-364.
  46. Agha A, Hornung M, Rennert J, et al. Contrast-enhanced ultrasonography for localization of pathologic glands in patients with primary hyperparathyroidism. *Surgery*. 2012;151(4):580-586.
  47. Grayev AM, Gentry LR, Hartman MJ, Chen H, Perlman SB, Reeder SB. Presurgical localization of parathyroid adenomas with magnetic resonance imaging at 3.0 T: an



- adjunct method to supplement traditional imaging. *Ann Surg Oncol*. 2012;19(3):981-989.
48. Adler JT, Chen H, Schaefer S, Sippel RS. What is the added benefit of cervical ultrasound to (99m)Tc-sestamibi scanning in primary hyperparathyroidism? *Ann Surg Oncol*. 2011;18(10):2907-2911.
  49. Eichhorn-Wharry LI, Carlin AM, Talpos GB. Mild hypercalcemia: an indication to select 4-dimensional computed tomography scan for preoperative localization of parathyroid adenomas. *Am J Surg*. 2011;201(3):334-338; discussion 338.
  50. Patel CN, Salahudeen HM, Lansdown M, Scarsbrook AF. Clinical utility of ultrasound and 99mTc sestamibi SPECT/CT for preoperative localization of parathyroid adenoma in patients with primary hyperparathyroidism. *Clin Radiol*. 2010;65(4):278-287.
  51. Prommegger R, Wimmer G, Profanter C, et al. Virtual neck exploration: a new method for localizing abnormal parathyroid glands. *Ann Surg*. 2009;250(5):761-765.
  52. Thomas DL, Bartel T, Menda Y, Howe J, Graham MM, Juweid ME. Single photon emission computed tomography (SPECT) should be routinely performed for the detection of parathyroid abnormalities utilizing technetium-99m sestamibi parathyroid scintigraphy. *Clin Nucl Med*. 2009;34(10):651-655.
  53. Tresoldi S, Pompili G, Maiolino R, et al. Primary hyperparathyroidism: can ultrasonography be the only preoperative diagnostic procedure? *Radiol Med*. 2009;114(7):1159-1172.
  54. Tublin ME, Pryma DA, Yim JH, et al. Localization of parathyroid adenomas by sonography and technetium tc 99m sestamibi single-photon emission computed tomography before minimally invasive parathyroidectomy: are both studies really needed? *J Ultrasound Med*. 2009;28(2):183-190.
  55. Tang BN, Moreno-Reyes R, Blocklet D, et al. Accurate pre-operative localization of pathological parathyroid glands using 11C-methionine PET/CT. *Contrast Media Mol Imaging*. 2008;3(4):157-163.
  56. Ho Shon IA, Yan W, Roach PJ, et al. Comparison of pinhole and SPECT 99mTc-MIBI imaging in primary hyperparathyroidism. *Nucl Med Commun*. 2008;29(11):949-955.
  57. Ansquer C, Mirallie E, Carlier T, Abbey-Huguenin H, Aubron F, Kraeber-Bodere F. Preoperative localization of parathyroid lesions. Value of 99mTc-MIBI tomography and factors influencing detection. *Nuklearmedizin*. 2008;47(4):158-162.
  58. Nichols KJ, Tomas MB, Tronco GG, et al. Preoperative parathyroid scintigraphic lesion localization: accuracy of various types of readings. *Radiology*. 2008;248(1):221-232.
  59. Carlier T, Oudoux A, Mirallie E, et al. 99mTc-MIBI pinhole SPECT in primary hyperparathyroidism: comparison with conventional SPECT, planar scintigraphy and ultrasonography. *Eur J Nucl Med Mol Imaging*. 2008;35(3):637-643.
  60. Boudreaux BA, Magnuson JS, Asher SA, Desmond R, Peters GE. The role of ultrasonography in parathyroid surgery. *Arch Otolaryngol Head Neck Surg*. 2007;133(12):1240-1244.

61. Taieb D, Hassad R, Sebag F, et al. Tomoscintigraphy improves the determination of the embryologic origin of parathyroid adenomas, especially in apparently inferior glands: imaging features and surgical implications. *J Nucl Med Technol.* 2007;35(3):135-139.
62. Prasanna S, Davies G, Bochner M, Kollias J, Malycha P. Minimally invasive parathyroidectomy using surgeon-performed ultrasound and sestamibi. *ANZ J Surg.* 2007;77(9):774-777.
63. Lavelly WC, Goetze S, Friedman KP, et al. Comparison of SPECT/CT, SPECT, and planar imaging with single- and dual-phase (99m)Tc-sestamibi parathyroid scintigraphy. *J Nucl Med.* 2007;48(7):1084-1089.
64. Ruf J, Seehofer D, Denecke T, et al. Impact of image fusion and attenuation correction by SPECT-CT on the scintigraphic detection of parathyroid adenomas. *Nuklearmedizin.* 2007;46(1):15-21.
65. Lo CY, Lang BH, Chan WF, Kung AW, Lam KS. A prospective evaluation of preoperative localization by technetium-99m sestamibi scintigraphy and ultrasonography in primary hyperparathyroidism. *Am J Surg.* 2007;193(2):155-159.
66. Rodgers SE, Hunter GJ, Hamberg LM, et al. Improved preoperative planning for directed parathyroidectomy with 4-dimensional computed tomography. *Surgery.* 2006;140(6):932-940; discussion 940-931.
67. Steward DL, Danielson GP, Afman CE, Welge JA. Parathyroid adenoma localization: surgeon-performed ultrasound versus sestamibi. *Laryngoscope.* 2006;116(8):1380-1384.
68. Barczynski M, Golkowski F, Konturek A, et al. Technetium-99m-sestamibi subtraction scintigraphy vs. ultrasonography combined with a rapid parathyroid hormone assay in parathyroid aspirates in preoperative localization of parathyroid adenomas and in directing surgical approach. *Clin Endocrinol (Oxf).* 2006;65(1):106-113.
69. Saeed S, Yao M, Philip B, Blend M. Localizing hyperfunctioning parathyroid tissue: MRI or nuclear study or both? *Clin Imaging.* 2006;30(4):257-265.
70. Krausz Y, Bettman L, Guralnik L, et al. Technetium-99m-MIBI SPECT/CT in primary hyperparathyroidism. *World J Surg.* 2006;30(1):76-83.
71. Solorzano CC, Carneiro-Pla DM, Irvin GL, 3rd. Surgeon-performed ultrasonography as the initial and only localizing study in sporadic primary hyperparathyroidism. *J Am Coll Surg.* 2006;202(1):18-24.
72. Lorberboym M, Ezri T, Schachter PP. Preoperative technetium Tc 99m sestamibi SPECT imaging in the management of primary hyperparathyroidism in patients with concomitant multinodular goiter. *Arch Surg.* 2005;140(7):656-660.
73. Masatsugu T, Yamashita H, Noguchi S, et al. Significant clinical differences in primary hyperparathyroidism between patients with and those without concomitant thyroid disease. *Surg Today.* 2005;35(5):351-356.
74. Ruf J, Lopez Hanninen E, Steinmuller T, et al. Preoperative localization of parathyroid

- glands. Use of MRI, scintigraphy, and image fusion. *Nuklearmedizin*. 2004;43(3):85-90.
75. Schachter PP, Issa N, Shimonov M, Czerniak A, Lorberboym M. Early, postinjection MIBI-SPECT as the only preoperative localizing study for minimally invasive parathyroidectomy. *Arch Surg*. 2004;139(4):433-437.
  76. Saint Marc O, Cogliandolo A, Pidoto RR, Pozzo A. Prospective evaluation of ultrasonography plus MIBI scintigraphy in selecting patients with primary hyperparathyroidism for unilateral neck exploration under local anaesthesia. *Am J Surg*. 2004;187(3):388-393.
  77. Lumachi F, Tregnaghi A, Zucchetto P, et al. Technetium-99m sestamibi scintigraphy and helical CT together in patients with primary hyperparathyroidism: a prospective clinical study. *Br J Radiol*. 2004;77(914):100-103.
  78. Kebapci M, Entok E, Kebapci N, Adapinar B. Preoperative evaluation of parathyroid lesions in patients with concomitant thyroid disease: role of high resolution ultrasonography and dual phase technetium 99m sestamibi scintigraphy. *J Endocrinol Invest*. 2004;27(1):24-30.
  79. Lumachi F, Marzola MC, Zucchetto P, Tregnaghi A, Cecchin D, Bui F. Hyperfunctioning parathyroid tumours in patients with thyroid nodules. Sensitivity and positive predictive value of high-resolution ultrasonography and 99mTc-sestamibi scintigraphy. *Endocr Relat Cancer*. 2003;10(3):419-423.
  80. Wakamatsu H, Noguchi S, Yamashita H, et al. Parathyroid scintigraphy with 99mTc-MIBI and 123I subtraction: a comparison with magnetic resonance imaging and ultrasonography. *Nucl Med Commun*. 2003;24(7):755-762.
  81. Lorberboym M, Minski I, Macadziob S, Nikolov G, Schachter P. Incremental diagnostic value of preoperative 99mTc-MIBI SPECT in patients with a parathyroid adenoma. *J Nucl Med*. 2003;44(6):904-908.
  82. Prager G, Czerny C, Ofluoglu S, et al. Impact of localization studies on feasibility of minimally invasive parathyroidectomy in an endemic goiter region. *J Am Coll Surg*. 2003;196(4):541-548.
  83. Leslie WD, Dupont JO, Bybel B, Riese KT. Parathyroid 99mTc-sestamibi scintigraphy: dual-tracer subtraction is superior to double-phase washout. *Eur J Nucl Med Mol Imaging*. 2002;29(12):1566-1570.
  84. Haber RS, Kim CK, Inabnet WB. Ultrasonography for preoperative localization of enlarged parathyroid glands in primary hyperparathyroidism: comparison with (99m)technetium sestamibi scintigraphy. *Clin Endocrinol (Oxf)*. 2002;57(2):241-249.
  85. Berczi C, Mezosi E, Galuska L, et al. Technetium-99m-sestamibi/pertechnetate subtraction scintigraphy vs ultrasonography for preoperative localization in primary hyperparathyroidism. *Eur Radiol*. 2002;12(3):605-609.
  86. Wakamatsu H, Noguchi S, Yamashita H, et al. Technetium-99m tetrofosmin for parathyroid scintigraphy: a direct comparison with (99m)Tc-MIBI, (201)Tl, MRI and US. *Eur J Nucl Med*.

- 2001;28(12):1817-1827.
87. Ho Shon IA, Roach PJ, Bernard EJ, Delbridge LW. Optimal pinhole techniques for preoperative localization with Tc-99m MIBI for primary hyperparathyroidism. *Clin Nucl Med.* 2001;26(12):1002-1009.
  88. Scheiner JD, Dupuy DE, Monchik JM, Noto RB, Cronan JJ. Pre-operative localization of parathyroid adenomas: a comparison of power and colour Doppler ultrasonography with nuclear medicine scintigraphy. *Clin Radiol.* 2001;56(12):984-988.
  89. Casara D, Rubello D, Pelizzo MR, Shapiro B. Clinical role of 99mTcO<sub>4</sub>/MIBI scan, ultrasound and intra-operative gamma probe in the performance of unilateral and minimally invasive surgery in primary hyperparathyroidism. *Eur J Nucl Med.* 2001;28(9):1351-1359.
  90. Prager G, Czerny C, Kurtaran A, et al. Minimally invasive open parathyroidectomy in an endemic goiter area: a prospective study. *Arch Surg.* 2001;136(7):810-816.
  91. Feingold DL, Alexander HR, Chen CC, et al. Ultrasound and sestamibi scan as the only preoperative imaging tests in reoperation for parathyroid adenomas. *Surgery.* 2000;128(6):1103-1109;discussion 1109-1110.
  92. Krausz Y, Lebensart PD, Klein M, et al. Preoperative localization of parathyroid adenoma in patients with concomitant thyroid nodular disease. *World J Surg.* 2000;24(12):1573-1578.
  93. Lumachi F, Zucchetta P, Marzola MC, et al. Advantages of combined technetium-99m-sestamibi scintigraphy and high-resolution ultrasonography in parathyroid localization: comparative study in 91 patients with primary hyperparathyroidism. *Eur J Endocrinol.* 2000;143(6):755-760.
  94. Gallowitsch HJ, Mikosch P, Kresnik E, Unterweger O, Lind P. Comparison between 99mTc-tetrofosmin/pertechnetate subtraction scintigraphy and 99mTc-tetrofosmin SPECT for preoperative localization of parathyroid adenoma in an endemic goiter area. *Invest Radiol.* 2000;35(8):453-459.
  95. Moka D, Voth E, Dietlein M, Larena-Avellaneda A, Schicha H. Technetium 99m-MIBI-SPECT: A highly sensitive diagnostic tool for localization of parathyroid adenomas. *Surgery.* 2000;128(1):29-35.
  96. Moka D, Eschner W, Voth E, Dietlein M, Larena-Avellaneda A, Schicha H. Iterative reconstruction: an improvement of technetium-99m MIBI SPET for the detection of parathyroid adenomas? *Eur J Nucl Med.* 2000;27(5):485-489.
  97. Hiromatsu Y, Ishibashi M, Nishida H, Okuda S, Miyake I. Technetium-99m tetrofosmin parathyroid imaging in patients with primary hyperparathyroidism. *Intern Med.* 2000;39(2):101-106.
  98. De Feo ML, Colagrande S, Biagini C, et al. Parathyroid glands: combination of (99m)Tc MIBI scintigraphy and US for demonstration of parathyroid glands and nodules. *Radiology.* 2000;214(2):393-402.

99. Catargi B, Raymond JM, Lafarge-Gense V, Leccia F, Roger P, Tabarin A. Localization of parathyroid tumors using endoscopic ultrasonography in primary hyperparathyroidism. *J Endocrinol Invest*. 1999;22(9):688-692.
100. Takami H, Oshima M, Sugawara I, et al. Pre-operative localization and tissue uptake study in parathyroid imaging with technetium-99m-sestamibi. *Aust N Z J Surg*. 1999;69(9):629-631.
101. Gallowitsch HJ, Mikosch P, Kresnik E, Gomez I, Lind P. Technetium 99m tetrofosmin parathyroid imaging. Results with double-phase study and SPECT in primary and secondary hyperparathyroidism. *Invest Radiol*. 1997;32(8):459-465.
102. Hewin DF, Brammar TJ, Kabala J, Farndon JR. Role of preoperative localization in the management of primary hyperparathyroidism. *Br J Surg*. 1997;84(10):1377-1380.
103. Chen CC, Holder LE, Scovill WA, Tehan AM, Gann DS. Comparison of parathyroid imaging with technetium-99m-pertechnetate/sestamibi subtraction, double-phase technetium-99m-sestamibi and technetium-99m-sestamibi SPECT. *J Nucl Med*. 1997;38(6):834-839.
104. Fayet P, Hoeffel C, Fulla Y, et al. Technetium-99m sestamibi scintigraphy, magnetic resonance imaging and venous blood sampling in persistent and recurrent hyperparathyroidism. *Br J Radiol*. 1997;70(833):459-464.
105. Bonjer HJ, Bruining HA, Valkema R, et al. Single radionuclide scintigraphy with 99mtechnetium-sestamibi and ultrasonography in hyperparathyroidism. *Eur J Surg*. 1997;163(1):27-32.
106. Arkles LB, Jones T, Hicks RJ, De Luise MA, Chou ST. Impact of complementary parathyroid scintigraphy and ultrasonography on the surgical management of hyperparathyroidism. *Surgery*. 1996;120(5):845-851.
107. Rauth JD, Sessions RB, Shupe SC, Ziessman HA. Comparison of Tc-99m MIBI and Tl-201/Tc-99m pertechnetate for diagnosis of primary hyperparathyroidism. *Clin Nucl Med*. 1996;21(8):602-608.
108. Light VL, McHenry CR, Jarjoura D, Sodee DB, Miron SD. Prospective comparison of dual-phase technetium-99m-sestamibi scintigraphy and high resolution ultrasonography in the evaluation of abnormal parathyroid glands. *Am Surg*. 1996;62(7):562-567; discussion 567-568.
109. Liou MJ, Huang HS, Lin JD, et al. The accuracy of ultrasonography and 201Tl-99mTc subtraction scan in localization of parathyroid lesions. *Changgeng Yi Xue Za Zhi*. 1996;19(2):121-128.
110. Billy HT, Rimkus DR, Hartzman S, Latimer RG. Technetium-99m-sestamibi single agent localization versus high resolution ultrasonography for the preoperative localization of parathyroid glands in patients with primary hyperparathyroidism. *Am Surg*. 1995;61(10):882-888.
111. Gallacher SJ, Kelly P, Shand J, et al. A comparison of 10 MHz ultrasound and 201-

- thallium/99m-technetium subtraction scanning in primary hyperparathyroidism. *Postgrad Med J*. 1993;69(811):376-380.
112. Uden P, Aspelin P, Berglund J, et al. Preoperative localization in unilateral parathyroid surgery. A cost-benefit study on ultrasound, computed tomography and scintigraphy. *Acta Chir Scand*. 1990;156(1):29-35.
  113. Whelan PJ, Rotstein LE, Rosen IB, Kucharczyk W. Do we really need another localizing technique for parathyroid glands? *Am J Surg*. 1989;158(4):382-384.
  114. Summers GW, Dodge DL, Kammer H. Accuracy and cost-effectiveness of preoperative isotope and ultrasound imaging in primary hyperparathyroidism. *Otolaryngol Head Neck Surg*. 1989;100(3):210-217.
  115. Roses DF, Sudarsky LA, Sanger J, Raghavendra BN, Reede DL, Blum M. The use of preoperative localization of adenomas of the parathyroid glands by thallium-technetium subtraction scintigraphy, high-resolution ultrasonography and computed tomography. *Surg Gynecol Obstet*. 1989;168(2):99-106.
  116. Auffermann W, Gooding GA, Okerlund MD, et al. Diagnosis of recurrent hyperparathyroidism: comparison of MR imaging and other imaging techniques. *AJR Am J Roentgenol*. 1988;150(5):1027-1033.
  117. Peck WW, Higgins CB, Fisher MR, Ling M, Okerlund MD, Clark OH. Hyperparathyroidism: comparison of MR imaging with radionuclide scanning. *Radiology*. 1987;163(2):415-420.
  118. Gooding GA, Okerlund MD, Stark DD, Clark OH. Parathyroid imaging: comparison of double-tracer (Tl-201, Tc-99m) scintigraphy and high-resolution US. *Radiology*. 1986;161(1):57-64.
  119. Winzelberg GG, Hydovitz JD, O'Hara KR, et al. Parathyroid adenomas evaluated by Tl-201/Tc-99m pertechnetate subtraction scintigraphy and high-resolution ultrasonography. *Radiology*. 1985;155(1):231-235.
